# Supplementary material for: Fe3O4-4,4′-biphenyldicarboxaldehyde superparamagnetic-nanomaterial for the high-efficiency removal of 9-phenanthrol: experimental combined with DFT investigations
Source: Royal Society of Chemistry journal article supplement (doi:10.1039/d2en00543c), 2022-01-01
Supplement: d2en00543c1.pdf [file d2en00543c1.pdf]

## Supplementary Material

### **Fe<sub>3</sub>O<sub>4</sub>-4,4'-Biphenyldicarboxaldehyde superparamagnetic-nanomaterial for high-efficiency removal of 9-Phenanthrol: Experimental combined with DFT investigations**

Zhengwen Wei <sup>a,b</sup>, Xiang-fei Lü <sup>a,b</sup>, Wei Wang <sup>a,b</sup>□, Giuseppe Mele <sup>c</sup>□, Zhen-Yi Jiang <sup>d</sup>

<sup>a</sup> *Key Laboratory of Subsurface Hydrology and Ecological Effects in Arid Region of the Ministry of Education, Chang'an University, No. 126 Yanta Road, Xi'an 710054, Shaanxi, China,*

<sup>b</sup> *School of Water and Environment, Chang'an University, Xi'an, 710054, P.R. China*

<sup>c</sup> *Department of Engineering for Innovation, University of Salento, Lecce, 73100, Italy*

<sup>d</sup> *Institute of Modern Physics, Northwest University, Xi'an Shaanxi, 710054, China*

□Corresponding author.

Wei Wang, Ph.D

Department of Chemical engineering

School of Water and Environment

Chang'an University

Tel: +86-29-82339052,

Fax: +86-29-82335485

E-mail address: [wwchem@126.com](mailto:wwchem@126.com)

□Corresponding author.

Giuseppe Mele,

Professor of Department of Engineering for Innovation,

University of Salento,

Tel: +39-0832-297-281

Fax: +39-0832-297-733

Email address: [giuseppe.mele@unisalento.it](mailto:giuseppe.mele@unisalento.it)

## **Document prepared:**

Total number of pages of Supporting Information: 11

Number of formulas in Supporting Information: 14

Number of Tables in Supporting Information: 4

## **List of Supplemental Information:**

### **Detailed description of the formula**

**Table S1.** Structural information of the original magnetic oxides and the derived magnetic nanocomposite.

**Table S2.** Adsorption kinetics parameters for adsorption of 9-PROL on magnetic

**Table S3.** Isotherm fitting results of 9-PROL adsorption on magnetic samples.

**Table S4.** The distance between the  $\text{Fe}_3\text{O}_4\text{-}0.75\text{BIPHENY}$  and 9-PROL molecular under different bonding modes.

## Detailed description of the formula:

### Evaluation on adsorption performance and removal efficiency

The removal efficiency and adsorption capacity of the magnet samples were determined according to the following formula:

$$R = \frac{(C_0 - C_e)}{C_0} \times 100\% \quad (1)$$

$$Q = \frac{(C_0 - C_e) \times V}{M} \quad (2)$$

Where  $C_0$  represented the initial concentration of 9-PROL, the  $C_e$  was the concentration of the suspension at the adsorption reached equilibrium.  $V$  (mL) was the volume of the 9-PROL solution to be treated,  $M$  (g) represented the mass of the adsorbents.

### The kinetic models

The Boyd, Weber-Morris-diffusion, Intra-particle diffusion, Elovich, pseudo-first-order and pseudo-second-order model were applied to fit the experiment data respectively, and the equations were presented as follows:

#### Boyd model:

$$B_t = -2.30258 \lg(1 - F) - 0.49770 \quad (3)$$

$$F = \frac{Q_t}{Q_e} \quad (4)$$

The intercept (b) of the straight line could be obtained by the linear relationship of  $B_t$  vs. time. Where  $Q_e$  and  $Q_t$  (mg/g) represent the adsorption capacity at equilibrium time and time  $t$  (min).

**Weber-Morris-diffusion model:**

$$\ln\left(1 - \frac{Q_t}{Q_e}\right) = -k_w t \quad (5)$$

Whereas  $k_w$  ( $\text{min}^{-1}$ ) represent the rate constants of the Weber-Morris adsorption diffusion models.

**Intra-particle diffusion model:**

$$Q_t = k_p t^{1/2} + c \quad (6)$$

Whereas  $k_p$  ( $\text{mg g}^{-1} \text{min}^{0.5}$ ) represent the rate constants of the Weber-Morris adsorption diffusion models. Besides,  $c$  ( $\text{mg/g}$ ) represents the thickness of the boundary layer.

**Elovich model:**

$$Q_e = a \ln \frac{b}{a} + a \ln t \quad (7)$$

Where  $Q_e$  ( $\text{mg/g}$ ) represent the adsorption capacity at equilibrium time ( $\text{min}$ ), and  $a$  ( $\text{mg/g}$ ),  $b$  ( $\text{min mg g}^{-1}$ ) are the adsorption rate constant of the Elovich model, respectively.

**Pseudo-first-order:**

$$Q_t = Q_e(1 - e^{-k_1 t}) \quad (8)$$

**Pseudo-second-order:**

$$Q_t = \frac{Q_e^2 k_2 t}{1 + k_2 Q_e t} \quad (9)$$

Where  $Q_e$  and  $Q_t$  ( $\text{mg/g}$ ) represent the adsorption capacity at equilibrium time and time  $t$  ( $\text{min}$ ), and  $k_1$  ( $\text{min}^{-1}$ ),  $k_2$  ( $\text{g mg}^{-1} \text{min}^{-1}$ ) are the adsorption rate constant of the two kinetic models, respectively

**The isotherm models:**

The Sips, Temkin, Toth, langmuir and Freundlich model were applied to fit the experiment data respectively, and the equations were presented as follows:

**Sips model:**

$$Q_e = q_{max1} \left( \frac{K_s C_e^{N_s}}{1 + K_s C_e^{N_s}} \right) \quad (10)$$

Where  $K_s$  (L mmol<sup>-1</sup>) is associated with the energy of adsorption and  $N_s$  indicates the system heterogeneity,  $q_{max1}$  represent the maximum adsorption capacity (mg/g) caluated by Sips model. Where  $Q_e$  (mg/g) was the amount of 9-PROL adsorption at equilibrium

**Temkin model:**

$$Q_e = \frac{RT}{b_T} \ln K_T + \frac{RT}{b_T} \ln C_e \quad (11)$$

Where  $K_T$  is the equilibrium bond constant related to the maximum energy of bond.  $R$  is the universal gas constant and  $T$  is the temperature in terms of Kelvin. The  $b_T$  constant represents the bond energy.

**Toth model:**

$$Q_e = \frac{q_{max2} b_T C_e}{\left( 1 + (b_T C_e)^{R_T} \right)^{1/R_T}} \quad (12)$$

Where  $b_T$  was the Toth constant and  $R_T$  was the exponent of heterogeneous adsorption,  $q_{max2}$  represent the maximum adsorption capacity (mg/g) caluated by Toth model.

**Langmuir model:**

$$Q_e = \frac{q_m k C_e}{1 + k C_e} \quad (13)$$

Where  $Q_e$  (mg/g) and  $C_e$  (mg/L) were the amount of 9-PROL adsorption and residual 9-PROL concentration at equilibrium;  $q_m$  (mg/g) represented the maximum adsorption capacity of 9-PROL, and  $k$  is the Langmuir adsorption equilibrium constant ( $L \text{ mg}^{-1}$ ).

**Freundlich model:**

$$Q_e = K_F C_e^n \quad (14)$$

Where  $K_F$  is the Freundlich constant ( $\text{mg}^{(1-n)} \text{ L}^n \text{ g}^{-1}$ ) and  $n$  (dimensionless) is the Freundlich intensity parameter.

Table S1. Structural information of the original magnetic oxides and the derived magnetic nanocomposite.

| Samples                                     | $S_{\text{BET}}$ (m <sup>2</sup> /g) | $V_{\text{pores}}$ (cm <sup>3</sup> /g) | Pore size (nm) |
|---------------------------------------------|--------------------------------------|-----------------------------------------|----------------|
| Fe <sub>3</sub> O <sub>4</sub>              | 35.55                                | 0.178                                   | 20.03          |
| Fe <sub>3</sub> O <sub>4</sub> -AMINO       | 4.73                                 | 0.0215                                  | 18.22          |
| Fe <sub>3</sub> O <sub>4</sub> -0.75BIPHENY | 3.47                                 | 0.0174                                  | 19.98          |



Table S2. Adsorption kinetics parameters for adsorption of 9-PROL on magnetic samples.

| Models                                       | Parameters                                       | Fe <sub>3</sub> O <sub>4</sub> | Fe <sub>3</sub> O <sub>4</sub> -<br>AMINO | Fe <sub>3</sub> O <sub>4</sub> -<br>0.75BIPHENY |
|----------------------------------------------|--------------------------------------------------|--------------------------------|-------------------------------------------|-------------------------------------------------|
| <i>Boyd</i>                                  | $k$ ( $\text{min}^{-1}$ )                        | 0.00514                        | 0.00597                                   | 0.00615                                         |
|                                              | $b$                                              | -0.62009                       | -0.80516                                  | -0.78911                                        |
|                                              | $R^2$                                            | 0.92481                        | 0.87196                                   | 0.83599                                         |
| <i>Weber-Morris<br/>adsorption diffusion</i> | $k_w$ ( $\text{min}^{-1}$ )                      | 0.00514                        | 0.00597                                   | 0.00615                                         |
|                                              | $R^2$                                            | 0.92481                        | 0.87196                                   | 0.83599                                         |
|                                              | $k_{p1}$ ( $\text{mg g}^{-1} \text{min}^{1/2}$ ) | 1.69537                        | 1.65071                                   | 2.39518                                         |
| <i>Intra-particle diffusion</i>              | $R^2$                                            | 0.98657                        | 0.99102                                   | 0.99415                                         |
|                                              | $k_{p2}$ ( $\text{mg g}^{-1} \text{min}^{1/2}$ ) | 0.98083                        | 0.90868                                   | 1.15802                                         |
|                                              | $R^2$                                            | 0.98633                        | 0.99672                                   | 0.99509                                         |
|                                              | $k_{p3}$ ( $\text{mg g}^{-1} \text{min}^{1/2}$ ) | 0.50105                        | 0.36029                                   | 0.55674                                         |
|                                              | $R^2$                                            | 0.7895                         | 0.6844                                    | 0.63482                                         |
| <i>Elovich</i>                               | $a$                                              | 8.0238                         | 7.4962                                    | 10.4461                                         |
|                                              | $b$                                              | 0.41705                        | 0.34768                                   | 0.56118                                         |
|                                              | $R^2$                                            | 0.99815                        | 0.99813                                   | 0.99833                                         |
| <i>Pseudo-first order</i>                    | $Q_e$ ( $\text{mg g}^{-1}$ )                     | 29.7397                        | 27.2781                                   | 38.3679                                         |
|                                              | $k_1$ ( $\text{min}^{-1}$ )                      | 0.00482                        | 0.00439                                   | 0.00514                                         |
|                                              | $R^2$                                            | 0.9905                         | 0.99239                                   | 0.98666                                         |
| <i>Pseudo-second order</i>                   | $Q_e$ ( $\text{mg g}^{-1}$ )                     | 37.5381                        | 35.1829                                   | 48.0475                                         |
|                                              | $k_2$ ( $\text{g mg}^{-1} \text{min}^{-1}$ )     | 0.000128                       | 0.000119                                  | 0.000109                                        |
|                                              | $R^2$                                            | 0.99576                        | 0.99544                                   | 0.99607                                         |

Table S3. Isotherm fitting results of 9-PROL adsorption on magnetic samples.

| Models            | Parameters                                                  | Fe <sub>3</sub> O <sub>4</sub> | Fe <sub>3</sub> O <sub>4</sub> -AMINO | Fe <sub>3</sub> O <sub>4</sub> -<br>0.75BIPHENY |
|-------------------|-------------------------------------------------------------|--------------------------------|---------------------------------------|-------------------------------------------------|
| <i>Sips</i>       | $q_{max1}$ (mg g <sup>-1</sup> )                            | 49.1033                        | 43.1546                               | 89.2646                                         |
|                   | $K_s$ (L mmol <sup>-1</sup> )                               | 0.66527                        | 0.53262                               | 4.023                                           |
|                   | $N_s$                                                       | 1.17793                        | 1.16132                               | 1.15139                                         |
|                   | $R^2$                                                       | 0.99648                        | 0.99873                               | 0.99903                                         |
| <i>Temkin</i>     | $b_T$                                                       | 202.5135                       | 234.6849                              | 124.0314                                        |
|                   | $K_T$ (L mg <sup>-1</sup> )                                 | 4.8367                         | 4.1268                                | 28.2025                                         |
|                   | $R^2$                                                       | 0.99963                        | 0.99749                               | 0.98369                                         |
| <i>Toth</i>       | $q_{max2}$ (mg g <sup>-1</sup> )                            | 48.1364                        | 41.2109                               | 80.8035                                         |
|                   | $B_t$ (L mg <sup>-1</sup> )                                 | 0.53054                        | 0.44465                               | 2.6675                                          |
|                   | $N_T$                                                       | 1.32843                        | 1.37678                               | 1.47748                                         |
|                   | $R^2$                                                       | 0.99529                        | 0.99851                               | 0.99863                                         |
| <i>Langmuir</i>   | $q_m$ (mg g <sup>-1</sup> )                                 | 56.5999                        | 48.8424                               | 109.7346                                        |
|                   | $k$ (L mg <sup>-1</sup> )                                   | 0.5242                         | 0.4476                                | 2.2472                                          |
|                   | $R^2$                                                       | 0.99498                        | 0.99683                               | 0.99772                                         |
| <i>Freundlich</i> | $K_F$ (mg <sup>(1-n)</sup> L <sup>n</sup> g <sup>-1</sup> ) | 18.9036                        | 15.2187                               | 94.5572                                         |
|                   | $n$                                                         | 0.53043                        | 0.51384                               | 0.66163                                         |
| □                 | $R^2$                                                       | 0.96282                        | 0.95988                               | 0.98153                                         |

Table S4. The distance between the Fe<sub>3</sub>O<sub>4</sub>-0.75BIPHENY and 9-PROL molecular under different bonding modes.

| □ Bond lengths between specific atoms (Number 1 Atom <i>A</i> -Number 2 Atom <i>B</i> ) |                    |               |                |                |                |                |                |
|-----------------------------------------------------------------------------------------|--------------------|---------------|----------------|----------------|----------------|----------------|----------------|
| <i>A</i>                                                                                | Atoms              | <i>9C-43C</i> | <i>10C-46C</i> | <i>11C-45C</i> | <i>12C-44C</i> | <i>13C-40C</i> | <i>14C-39C</i> |
|                                                                                         | Bond lengths (Å)   | 3.56258       | 3.79979        | 3.73294        | 3.47785        | 3.29166        | 3.33104        |
| <i>B</i>                                                                                | Atoms              | <i>9C-43C</i> | <i>10C-46C</i> | <i>11C-45C</i> | <i>12C-44C</i> | <i>13C-40C</i> | <i>14C-39C</i> |
|                                                                                         | Bond lengths (Å)   | 3.50008       | 3.40317        | 3.3937         | 3.41339        | 3.46194        | 3.54937        |
| <i>C</i>                                                                                | Atoms              | <i>3C-43C</i> | <i>4C-39C</i>  | <i>5C-40C</i>  | <i>6C-44C</i>  | <i>7C-45C</i>  | <i>8C-46C</i>  |
|                                                                                         | Bond lengths (Å)   | 3.87865       | 3.48128        | 3.43846        | 3.78523        | 4.15081        | 4.24026        |
| <i>D</i>                                                                                | Atoms              | <i>3C-43C</i> | <i>4C-39C</i>  | <i>5C-40C</i>  | <i>6C-44C</i>  | <i>7C-45C</i>  | <i>8C-46C</i>  |
|                                                                                         | □ Bond lengths (Å) | 3.29317       | 3.8702         | 4.22789        | 4.12006        | 3.56431        | 3.09543        |
